# Supplementary material for: Collision Cross-Section Calibration Strategy for Lipid Measurements in SLIM-Based High-Resolution Ion Mobility
Source: PubMed Central journal article supplement (PMC9516683; doi:10.1021/jasms.2c00067), 2022-06-02
Supplement: js2c00067_si_001.pdf [file js2c00067_si_001.pdf]

## Supporting Information

### A Collision Cross Section Calibration Strategy for Lipid Measurements in SLIM-based High Resolution Ion Mobility

Bailey S. Rose, Jody C. May, Allison R. Reardon, and John A. McLean\*

Center for Innovative Technology, Department of Chemistry, Vanderbilt Institute of Chemical  
Biology, Vanderbilt Institute for Integrative Biosystems Research and Education, Vanderbilt-  
Ingram Cancer Center, Vanderbilt University, Nashville, TN, 37235, United States

\* Corresponding Author Email: [john.a.mclean@vanderbilt.edu](mailto:john.a.mclean@vanderbilt.edu)

#### SI Contents:

|                                                                                                 |     |
|-------------------------------------------------------------------------------------------------|-----|
| <b>Figure S1.</b> – RPLC method details.....                                                    | S2  |
| <b>Figure S2.</b> – Arrival time and calibrated CCS reproducibility.....                        | S3  |
| <b>Figure S3.</b> – Initial calibration results.....                                            | S4  |
| <b>Figure S4.</b> – Tune Mix calibration plot.....                                              | S5  |
| <b>Table S1.</b> – Semi-empirical correction factors.....                                       | S6  |
| <b>Table S2.</b> – Calibrated lipid CCS values.....                                             | S7  |
| <b>Table S3-6.</b> – Calibration simulation for evaluation of calibrant error contribution..... | S10 |

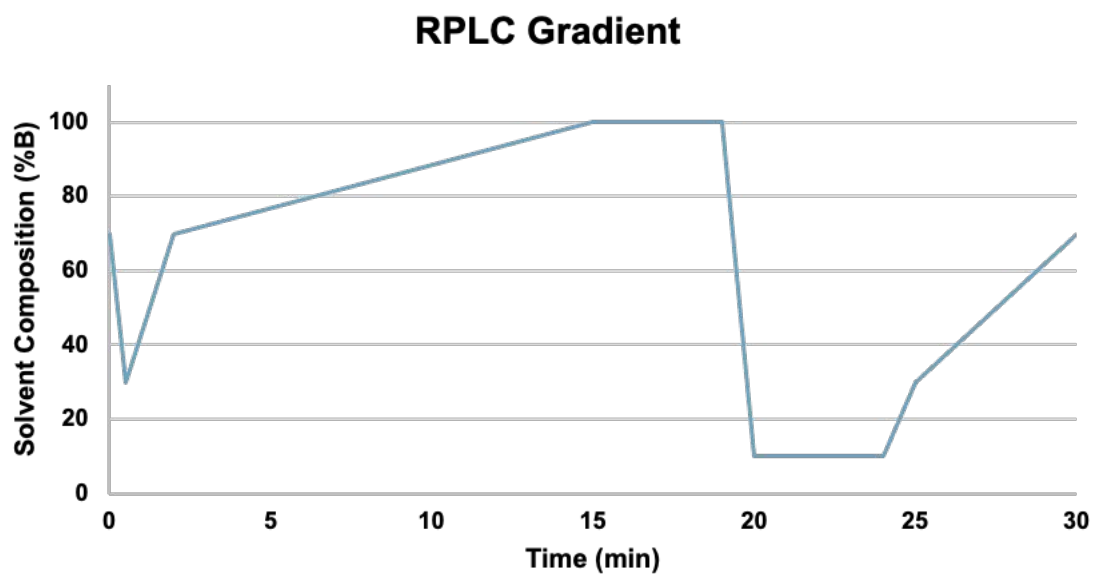

**Figure S1.** The standard lipid mix was analyzed using a 1290 Infinity LC system (Agilent). Reversed phase LC was performed at a flow rate of 250  $\mu\text{L}/\text{min}$  using a C18 column (HypersilGold 1.9  $\mu\text{m}$ , 2.1 mm x 100 mm column, Thermo Fisher) held at 40  $^{\circ}\text{C}$  with mobile phases consisting of 10 mM ammonium formate and 0.1% formic acid in  $\text{H}_2\text{O}$  (A) and 60:36:4 IPA:ACN: $\text{H}_2\text{O}$  (B). The 30 minute gradient is illustrated above.

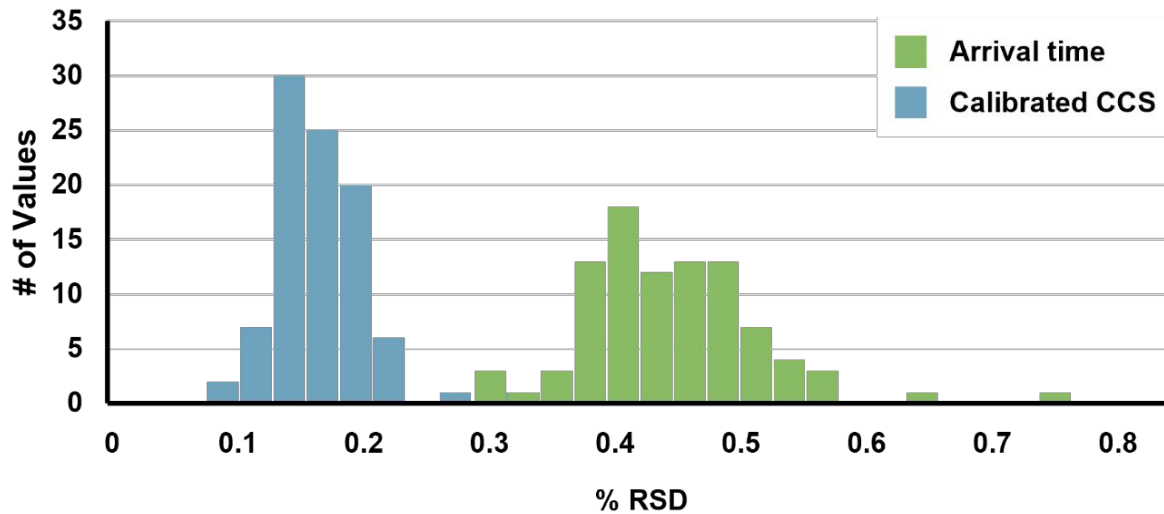

**Figure S2.** Inter-day reproducibility of experimental arrival times (green) and calibrated CCS values from all lipid features (n = 92).

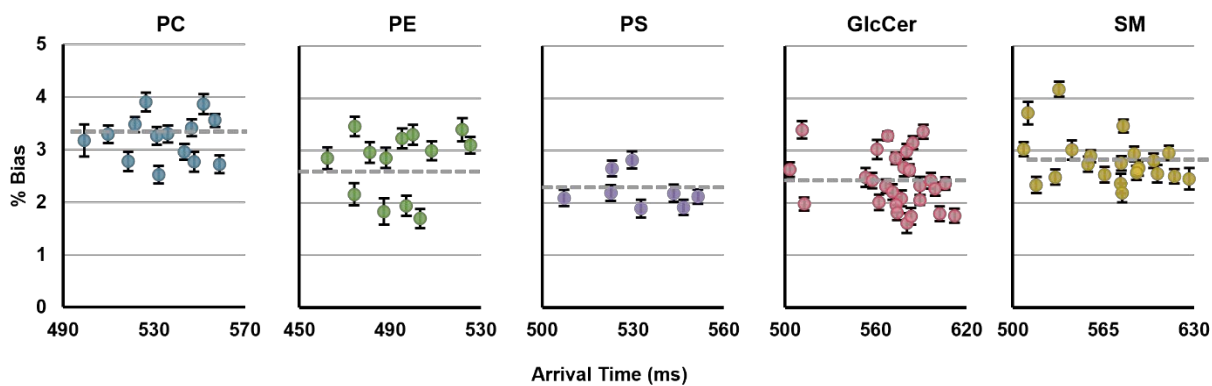

**Figure S3.** CCS calibration bias for all values calibrated from triplicate measurements using HFAPs with a 3<sup>rd</sup> order polynomial as compared to established  $DTCCS$  values. Dashed lines represent average biases for each subclass, and error bars represent the measurement standard deviation.

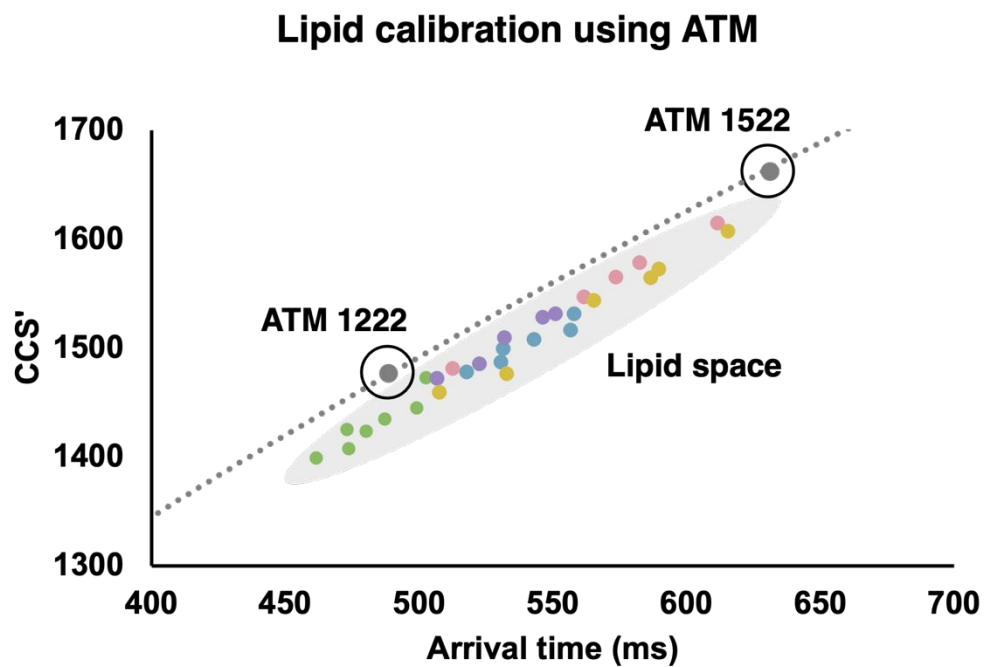

**Figure S4:** CCS calibration plot of the lipid analytes as compared to the Tune Mix ions  $m/z$  1222 and  $m/z$  1522.

**Table S1.** Subclass specific semi-empirically derived correction factors used for correction of HFAP-calibrated CCS values.

| <b>Class</b>                | <b>Subclass</b> | <b>Correction factor</b> |
|-----------------------------|-----------------|--------------------------|
| <b>Glycerophospholipids</b> | PC              | 0.0321                   |
|                             | PE              | 0.0275                   |
|                             | PS              | 0.0223                   |
| <b>Sphingolipids</b>        | GlcCer          | 0.0241                   |
|                             | SM              | 0.0281                   |
| <b>SPLASH Mix</b>           |                 | 0.0150                   |

**Table S2.** Table of calibrated and corrected CCS values for all lipids using correction factors in Table S1. <sup>DT</sup>CCS values in the left column are sourced from the Unified CCS Compendium. Lipid features from each subclass that were not identified are annotated as their subclass and measured *m/z*. When arrival time features were observed for one *m/z*, peak numbers are annotated in ascending order of arrival time. Species used as calibrants in the lipid calibrant study (Figure 2) are denoted with a (\*).

| Name                             | Tentative ID |                                     | Feature description |                       |        |                                          |             |
|----------------------------------|--------------|-------------------------------------|---------------------|-----------------------|--------|------------------------------------------|-------------|
|                                  | Adduct       | <sup>DT</sup> CCS (Å <sup>2</sup> ) | Bias (%)            | <i>m/z</i> (measured) | Peak # | TW-SLIM <sup>CCS</sup> (Å <sup>2</sup> ) | RSD (%)     |
| <b>Phosphatidylcholines</b>      |              |                                     |                     |                       |        |                                          |             |
| PC 34:01                         | [M+H]        | 283.1                               | 0.21                | 760.5899              | 1      | 283.7                                    | 0.14        |
| PC 34:01                         | [M+H]        | 283.1                               | 0.64                | 760.5902              | 2      | 284.9                                    | 0.18        |
| PC 34:01*                        | [M+Na]       | 286.0                               | 0.00                | 782.5720              | 1      | 286.0                                    | 0.16        |
| PC 34:02                         | [M+H]        | 280.6                               | 0.03                | 758.5742              | 1      | 280.7                                    | 0.17        |
| PC 34:02*                        | [M+Na]       | 284.2                               | -0.49               | 780.5566              | 1      | 282.8                                    | 0.18        |
| PC 34:03                         | [M+H]        | 278.2                               | -0.09               | 756.5605              | 1      | 277.9                                    | 0.31        |
| PC 36:01                         | [M+H]        | 289.4                               | 0.15                | 788.6210              | 1      | 289.8                                    | 0.17        |
| PC 36:01                         | [M+H]        | 289.4                               | 0.60                | 788.6215              | 2      | 291.1                                    | 0.19        |
| PC 36:01                         | [M+Na]       | 291.4                               | -0.50               | 810.6054              | 1      | 290.0                                    | 0.18        |
| PC 36:01                         | [M+Na]       | 291.4                               | 0.29                | 810.6051              | 2      | 292.2                                    | 0.13        |
| PC 36:02                         | [M+H]        | 287.1                               | 0.03                | 786.6056              | 1      | 287.2                                    | 0.17        |
| PC 36:02*                        | [M+Na]       | 289.8                               | -0.31               | 808.5896              | 1      | 288.9                                    | 0.15        |
| PC 36:03*                        | [M+Na]       | 288.2                               | -0.74               | 806.5746              | 1      | 286.1                                    | 0.17        |
| PC 38:03*                        | [M+Na]       | 294.2                               | -0.55               | 834.6071              | 1      | 292.6                                    | 0.17        |
| PC ( <i>m/z</i> 782.57)          | --           | --                                  | --                  | 782.574233            | 1      | 293.3                                    | 0.19        |
| PC ( <i>m/z</i> 804.56)          | --           | --                                  | --                  | 804.558767            | 1      | 296.4                                    | 0.14        |
| PC ( <i>m/z</i> 832.59)          | --           | --                                  | --                  | 832.590633            | 1      | 302.9                                    | 0.17        |
| PC ( <i>m/z</i> 836.63)          | --           | --                                  | --                  | 836.624333            | 1      | 305.0                                    | 0.17        |
| <b>Average absolute % bias</b>   |              |                                     | <b>0.33</b>         | <b>Average % RSD</b>  |        |                                          | <b>0.17</b> |
| <b>Phosphatidylethanolamines</b> |              |                                     |                     |                       |        |                                          |             |
| PE 34:01*                        | [M+H]        | 271.1                               | 0.67                | 718.5438              | 1      | 272.9                                    | 0.18        |
| PE 34:01                         | [M+Na]       | 277.1                               | 0.44                | 740.5270              | 1      | 278.3                                    | 0.19        |
| PE 34:02*                        | [M+H]        | 269.5                               | 0.06                | 716.5275              | 1      | 269.7                                    | 0.21        |
| PE 34:02*                        | [M+Na]       | 274.1                               | 0.17                | 738.5098              | 1      | 274.6                                    | 0.20        |
| PE 36:01*                        | [M+H]        | 278.1                               | 0.51                | 746.5752              | 1      | 279.5                                    | 0.19        |
| PE 36:01*                        | [M+Na]       | 283.3                               | -1.09               | 768.5587              | 1      | 280.2                                    | 0.18        |
| PE 36:01                         | [M+2Na-H]    | 284.9                               | 0.31                | 790.5421              | 1      | 285.8                                    | 0.16        |
| PE 36:02*                        | [M+H]        | 276.2                               | 0.07                | 744.5589              | 1      | 276.4                                    | 0.19        |
| PE 36:02                         | [M+Na]       | 281.0                               | 0.20                | 766.5410              | 1      | 281.6                                    | 0.18        |
| PE 36:02                         | [M+Na]       | 281.0                               | -0.85               | 766.5448              | 2      | 278.6                                    | 0.19        |
| PE 36:03                         | [M+H]        | 274.4                               | -0.63               | 742.5467              | 1      | 272.7                                    | 0.22        |
| PE 36:03                         | [M+Na]       | 278.7                               | -0.96               | 764.5288              | 1      | 276.0                                    | 0.25        |
| PE ( <i>m/z</i> 740.53)          | --           | --                                  | --                  | 740.5295              | 1      | 273.5                                    | 0.20        |
| PE ( <i>m/z</i> 768.56)          | --           | --                                  | --                  | 768.5599              | 1      | 285.0                                    | 0.22        |
| <b>Average absolute % bias</b>   |              |                                     | <b>0.51</b>         | <b>Average % RSD</b>  |        |                                          | <b>0.20</b> |

| <b>Phosphatidylserines</b>     |                        |       |             |                      |   |       |             |
|--------------------------------|------------------------|-------|-------------|----------------------|---|-------|-------------|
| PS 36:01*                      | [M+H]                  | 285.6 | 0.40        | 790.5650             | 1 | 286.7 | 0.15        |
| PS 36:02*                      | [M+H]                  | 283.1 | -0.16       | 788.5505             | 1 | 282.6 | 0.16        |
| PS 38:04                       | [M+H]                  | 286.7 | 0.56        | 812.5484             | 1 | 286.5 | 0.15        |
| PS 38:04                       | [M+H]                  | 286.7 | -0.07       | 812.5490             | 2 | 288.3 | 0.16        |
| PS 40:04*                      | [M+H]                  | 293.5 | -0.34       | 840.5801             | 1 | 292.5 | 0.15        |
| PS 40:05                       | [M+H]                  | 291.9 | -0.08       | 838.5661             | 1 | 291.7 | 0.17        |
| PS 40:06*                      | [M+H]                  | 290.0 | -0.37       | 836.5494             | 1 | 288.9 | 0.17        |
| PS 40:06*                      | [M+Na]                 | 294.0 | -0.14       | 858.5327             | 1 | 293.6 | 0.14        |
| <b>Average absolute % bias</b> |                        |       | <b>0.27</b> | <b>Average % RSD</b> |   |       | <b>0.16</b> |
| <b>Cerebrosides</b>            |                        |       |             |                      |   |       |             |
| GlcCer 36:01                   | [M+H-H <sub>2</sub> O] | 281.0 | 0.20        | 710.6001             | 1 | 281.5 | 0.14        |
| GlcCer 36:01                   | [M+H-H <sub>2</sub> O] | 281.0 | 0.95        | 710.5992             | 2 | 283.7 | 0.16        |
| GlcCer 36:01*                  | [M+Na]                 | 285.1 | -0.47       | 750.5925             | 1 | 283.8 | 0.12        |
| GlcCer 40:00                   | [M+Na]                 | 298.9 | -0.23       | 808.6726             | 1 | 298.2 | 0.15        |
| GlcCer 40:00                   | [M+Na]                 | 298.9 | 0.54        | 808.6729             | 2 | 300.5 | 0.14        |
| GlcCer 40:01                   | [M+H-H <sub>2</sub> O] | 293.9 | 0.05        | 766.6641             | 1 | 294.0 | 0.18        |
| GlcCer 40:01                   | [M+H-H <sub>2</sub> O] | 293.9 | 0.58        | 766.6653             | 2 | 295.6 | 0.19        |
| GlcCer 40:01*                  | [M+Na]                 | 297.3 | -0.44       | 806.6560             | 1 | 296.0 | 0.15        |
| GlcCer 40:02                   | [M+H]                  | 295.1 | -0.02       | 782.6565             | 1 | 295.1 | 0.15        |
| GlcCer 40:02                   | [M+H]                  | 295.1 | 0.84        | 782.6593             | 2 | 297.6 | 0.08        |
| GlcCer 42:00                   | [M+Na]                 | 304.3 | -0.02       | 836.7027             | 1 | 304.2 | 0.16        |
| GlcCer 42:00 OH                | [M+Na]                 | 306.7 | -0.08       | 852.6966             | 1 | 306.5 | 0.12        |
| GlcCer 42:01                   | [M+H-H <sub>2</sub> O] | 299.5 | 0.23        | 794.6925             | 1 | 300.2 | 0.17        |
| GlcCer 42:01                   | [M+H-H <sub>2</sub> O] | 299.5 | 0.70        | 794.6928             | 2 | 301.6 | 0.13        |
| GlcCer 42:01                   | [M+Na]                 | 302.9 | -0.83       | 834.6867             | 1 | 300.4 | 0.19        |
| GlcCer 42:01                   | [M+Na]                 | 302.9 | -0.12       | 834.6864             | 2 | 302.5 | 0.18        |
| GlcCer 42:01 OH                | [M+Na]                 | 305.4 | -0.18       | 850.6816             | 1 | 304.9 | 0.13        |
| GlcCer 42:02                   | [M+H]                  | 300.4 | -0.36       | 810.6905             | 1 | 299.3 | 0.15        |
| GlcCer 42:02                   | [M+H]                  | 300.4 | 0.18        | 810.6890             | 2 | 300.9 | 0.11        |
| GlcCer 42:02                   | [M+H]                  | 300.4 | 0.92        | 810.6884             | 3 | 303.2 | 0.14        |
| GlcCer 42:02                   | [M+H-H <sub>2</sub> O] | 297.6 | -0.13       | 792.6776             | 1 | 297.2 | 0.13        |
| GlcCer 42:02                   | [M+H-H <sub>2</sub> O] | 297.6 | 0.41        | 792.6778             | 2 | 298.8 | 0.12        |
| GlcCer 42:02*                  | [M+Na]                 | 300.7 | -0.63       | 832.6701             | 1 | 298.8 | 0.15        |
| GlcCer 42:02 OH*               | [M+Na]                 | 303.1 | -0.70       | 848.6660             | 1 | 301.0 | 0.16        |
| GlcCer 42:04 OH                | [M+H]                  | 300.2 | -0.48       | 822.6523             | 1 | 298.8 | 0.14        |
| GlcCer 43:02                   | [M+Na]                 | 303.6 | -0.39       | 846.6836             | 1 | 302.4 | 0.09        |
| GlcCer 44:02                   | [M+Na]                 | 307.5 | -0.66       | 860.7005             | 1 | 305.5 | 0.14        |
| GlcCer 46:05 OH*               | [M+H]                  | 309.9 | -0.69       | 876.6957             | 1 | 307.8 | 0.14        |
| <b>Average absolute % bias</b> |                        |       | <b>0.43</b> | <b>Average % RSD</b> |   |       | <b>0.14</b> |
| <b>Sphingomyelins</b>          |                        |       |             |                      |   |       |             |
| SM 34:01*                      | [M+H]                  | 281.2 | 0.18        | 703.5808             | 1 | 281.7 | 0.13        |
| SM 34:01                       | [M+Na]                 | 279.9 | 0.87        | 725.5647             | 1 | 282.3 | 0.22        |
| SM 36:01                       | [M+H]                  | 288.4 | -0.36       | 731.6116             | 1 | 287.4 | 0.15        |
| SM 36:01*                      | [M+Na]                 | 284.1 | 1.32        | 753.5268             | 1 | 287.9 | 0.15        |
| SM 36:02                       | [M+H]                  | 285.3 | -0.51       | 729.5966             | 1 | 283.9 | 0.15        |
| SM 38:00                       | [M+H]                  | 289.8 | 0.16        | 745.6293             | 1 | 290.3 | 0.18        |



|                                |                            |       |             |                      |   |       |             |
|--------------------------------|----------------------------|-------|-------------|----------------------|---|-------|-------------|
| SM 38:01                       | [M+H]                      | 293.4 | -0.11       | 759.6422             | 1 | 293.1 | 0.15        |
| SM 38:01                       | [M+Na]                     | 293.3 | 0.04        | 781.6248             | 1 | 293.4 | 0.12        |
| SM 40:00*                      | [M+H]                      | 300.8 | 0.08        | 789.6903             | 1 | 301.0 | 0.14        |
| SM 40:01                       | [M+H]                      | 299.1 | -0.10       | 787.6743             | 1 | 298.8 | 0.14        |
| SM 40:01                       | [M+Na]                     | 297.2 | 0.62        | 809.6581             | 1 | 299.0 | 0.13        |
| SM 40:02*                      | [M+H]                      | 296.8 | -0.31       | 785.6599             | 1 | 295.9 | 0.15        |
| SM 41:01*                      | [M+H]                      | 302.3 | -0.18       | 801.6911             | 1 | 301.7 | 0.15        |
| SM 41:02                       | [M+H]                      | 300.1 | -0.49       | 799.6761             | 1 | 298.6 | 0.19        |
| SM 42:00                       | [M+H]                      | 306.5 | 0.11        | 817.7225             | 1 | 306.8 | 0.14        |
| SM 42:01                       | [M+H]                      | 304.4 | -0.05       | 815.7058             | 1 | 304.3 | 0.14        |
| SM 42:02                       | [M+H]                      | 302.2 | -0.19       | 813.6896             | 1 | 301.6 | 0.15        |
| SM 42:02                       | [M+Na]                     | 302.0 | -0.28       | 835.6737             | 1 | 301.2 | 0.14        |
| SM 42:03                       | [M+H]                      | 300.8 | -0.66       | 811.6745             | 1 | 298.8 | 0.19        |
| SM 44:01                       | [M+H]                      | 305.7 | -0.29       | 827.7070             | 1 | 304.8 | 0.17        |
| SM 44:02                       | [M+H]                      | 311.0 | -0.39       | 843.7410             | 1 | 309.8 | 0.21        |
| SM 44:03*                      | [M+H]                      | 308.7 | -0.34       | 841.7226             | 1 | 307.6 | 0.14        |
| SM ( <i>m/z</i> 733.63)        | --                         | --    | --          | 733.6272             | 1 | 290.1 | 0.13        |
| SM ( <i>m/z</i> 761.66)        | --                         | --    | --          | 761.6590             | 1 | 295.6 | 0.14        |
| <b>Average absolute % bias</b> |                            |       | <b>0.35</b> | <b>Average % RSD</b> |   |       | <b>0.15</b> |
| <b>SPLASH Mix</b>              |                            |       |             |                      |   |       |             |
| 18:1(d7) LPC                   | [M+H]                      | 232.9 | -0.53       | 529.4026             | 1 | 231.7 | 0.09        |
| 18:1(d7) LPC                   | [M+Na]                     | 236.0 | -1.14       | 551.3809             | 1 | 233.4 | 0.10        |
| 15:0-18:1(d7) DG               | [M+H-<br>H <sub>2</sub> O] | 255.6 | 0.75        | 570.5576             | 1 | 256.7 | 0.16        |
| 15:0-18:1(d7) DG               | [M+Na]                     | 257.1 | -0.18       | 610.5485             | 1 | 257.6 | 0.12        |
| 15:0-18:1(d7) PE               | [M+H]                      | 271.7 | 0.31        | 711.5758             | 1 | 272.6 | 0.10        |
| 15:0-18:1(d7) PE               | [M+Na]                     | 277.8 | 0.03        | 733.5595             | 1 | 277.9 | 0.11        |
| 15:0-18:1(d7) PS               | [M+H]                      | 278.6 | 0.23        | 755.5674             | 1 | 279.2 | 0.10        |
| 18:1(d9) SM                    | [M+H]                      | 286.3 | 0.71        | 738.6596             | 1 | 287.5 | 0.10        |
| 18:1(d9) SM                    | [M+Na]                     | 286.9 | 0.22        | 760.6386             | 1 | 288.4 | 0.11        |
| 15:0-18:1(d7)-15:0<br>TG       | [M+NH <sub>4</sub> ]       | 312.1 | -0.11       | 829.8109             | 1 | 309.3 | 0.10        |
| 15:0-18:1(d7)-15:0<br>TG       | [M+Na]                     | 310.6 | -0.41       | 834.7644             | 1 | 311.7 | 0.10        |
| <b>Average absolute % bias</b> |                            |       | <b>0.42</b> | <b>Average % RSD</b> |   |       | <b>0.11</b> |

### Calibration Simulation for Evaluation of Calibrant Error Contribution

A calibration simulation was performed to assess the contribution of uncertainty associated with the reference HFAP <sup>DT</sup>CCS values. For each HFAP ion, 10 CCS values were selected from a uniform distribution centered around the accepted value with the width of the distribution corresponding to the uncertainty of the measurement, reported as %RSD (**Table S3**). The resulting values are tabulated below (**Table S4**).

**Table S3. HFAP calibrant CCS values.**

| HFAP ion | Arrival time (ms) | <sup>DT</sup> CCS | RSD   |
|----------|-------------------|-------------------|-------|
| m/z 622  | 223.66            | 202.8             | 0.12% |
| m/z 922  | 349.34            | 243.5             | 0.11% |
| m/z 1222 | 487.28            | 281.8             | 0.10% |
| m/z 1522 | 629.68            | 316.5             | 0.10% |
| m/z 1822 | 782.37            | 351.2             | 0.18% |
| m/z 2122 | 941.26            | 383.0             | 0.17% |
| m/z 2422 | 1103.69           | 412.9             | 0.14% |
| m/z 2722 | 1270.02           | 441.2             | 0.13% |

**Table S4. HFAP simulated CCS values.**

| HFAP ion | CCS (1) | CCS (2) | CCS (3) | CCS (4) | CCS (5) | CCS (6) | CCS (7) | CCS (8) | CCS (9) | CCS (10) |
|----------|---------|---------|---------|---------|---------|---------|---------|---------|---------|----------|
| m/z 622  | 202.63  | 202.70  | 202.81  | 203.00  | 202.65  | 203.01  | 202.60  | 203.02  | 202.68  | 202.85   |
| m/z 922  | 243.76  | 243.40  | 243.41  | 243.58  | 243.65  | 243.40  | 243.38  | 243.62  | 243.37  | 243.27   |
| m/z 1222 | 281.77  | 281.68  | 281.99  | 282.06  | 281.78  | 281.73  | 282.07  | 281.64  | 281.65  | 281.78   |
| m/z 1522 | 316.68  | 316.40  | 316.48  | 316.59  | 316.36  | 316.35  | 316.79  | 316.25  | 316.24  | 316.33   |
| m/z 1822 | 351.64  | 351.48  | 351.22  | 351.26  | 351.19  | 351.56  | 350.67  | 351.48  | 351.79  | 350.83   |
| m/z 2122 | 383.10  | 382.95  | 382.66  | 383.28  | 382.87  | 383.32  | 382.59  | 382.69  | 382.96  | 383.25   |
| m/z 2422 | 413.26  | 412.84  | 413.08  | 413.21  | 413.11  | 413.38  | 412.39  | 413.31  | 412.34  | 412.38   |
| m/z 2722 | 440.90  | 441.35  | 441.49  | 441.08  | 441.72  | 441.30  | 440.94  | 440.95  | 440.87  | 441.10   |

For each of the ten sets of CCS values, a calibration was performed using a trinomial equation. This resulted in the coefficients listed in **Table S5**.

**Table S5. Calibration coefficients for simulated calibrations.**

| Coeff.   | (1)       | (2)       | (3)       | (4)       | (5)       | (6)       | (7)       | (8)       | (9)       | (10)      |
|----------|-----------|-----------|-----------|-----------|-----------|-----------|-----------|-----------|-----------|-----------|
| <b>A</b> | 2.38E-07  | 2.52E-07  | 2.67E-07  | 2.36E-07  | 2.66E-07  | 2.18E-07  | 2.86E-07  | 2.27E-07  | 2.44E-07  | 2.47E-07  |
| <b>B</b> | -9.67E-04 | -9.89E-04 | -1.02E-03 | -9.55E-04 | -1.02E-03 | -9.14E-04 | -1.07E-03 | -9.31E-04 | -9.79E-04 | -9.78E-04 |
| <b>C</b> | 2.20E+00  | 2.20E+00  | 2.22E+00  | 2.18E+00  | 2.22E+00  | 2.16E+00  | 2.25E+00  | 2.16E+00  | 2.20E+00  | 2.19E+00  |
| <b>D</b> | 6.06E+02  | 6.05E+02  | 6.03E+02  | 6.10E+02  | 6.04E+02  | 6.14E+02  | 5.97E+02  | 6.14E+02  | 6.05E+02  | 6.08E+02  |

Applying these calibration equations to the PC lipid extract data resulted in an average uncertainty in the calibrated CCS values of 0.04% (Table S6).

**Table S6. Summary of calibrated CCS values of PC lipids using the simulated calibrant values.**

| Compound | Arrival time (ms) | Avg. calibrated CCS | Standard deviation | RSD    |
|----------|-------------------|---------------------|--------------------|--------|
| PC 34:03 | 499.31            | 286.8               | 0.1159             | 0.040% |
| PC 34:02 | 509.89            | 289.6               | 0.1158             | 0.040% |
| PC 34:01 | 521.66            | 292.8               | 0.1155             | 0.039% |
| PC 34:01 | 526.44            | 294.0               | 0.1153             | 0.039% |
| PC 34:02 | 518.68            | 291.8               | 0.1156             | 0.040% |
| PC 34:01 | 531.21            | 295.1               | 0.1150             | 0.039% |
| PC 36:02 | 536.05            | 296.4               | 0.1147             | 0.039% |
| PC 36:03 | 532.08            | 295.2               | 0.1149             | 0.039% |
| PC 36:01 | 551.85            | 300.5               | 0.1138             | 0.038% |
| PC 36:01 | 546.60            | 299.1               | 0.1141             | 0.038% |
| PC 36:02 | 543.39            | 298.2               | 0.1142             | 0.038% |
| PC 36:01 | 556.83            | 301.6               | 0.1134             | 0.038% |
| PC 36:01 | 547.63            | 299.2               | 0.1140             | 0.038% |
| PC 38:03 | 558.81            | 302.0               | 0.1132             | 0.038% |
